# Supplementary material for: Stoichiometry-controlled growth of BaxSr1−xTiO3 thin films and their electrical behavior in heterojunction assemblies
Source: Royal Society of Chemistry journal article supplement (doi:10.1039/c2ra20858j), 2012-01-01
Supplement: c2ra20858j.pdf [file c2ra20858j.pdf]

## Supplementary Information

### Stoichiometry-controlled growth of $\text{Ba}_x\text{Sr}_{1-x}\text{TiO}_3$ thin films and their electrical behavior in heterojunction assemblies

Soumen Das<sup>1</sup>, Daan Liu<sup>1</sup>, Vallivedu Janardhanam<sup>2</sup>, Chel-Jong Choi<sup>2</sup>, and Yoon-Bong Hahn<sup>1,2,\*</sup>

<sup>1</sup>School of Semiconductor and Chemical Engineering, <sup>2</sup>WCU Department of BIN Fusion Technology, Chonbuk National University, 664-14 Duckjin-Dong 1 Ga, Jeonju 561-756, Republic of Korea

\* Corresponding author:  
E-mail: [ybhahn@chonbuk.ac.kr](mailto:ybhahn@chonbuk.ac.kr) (Y. B. Hahn)

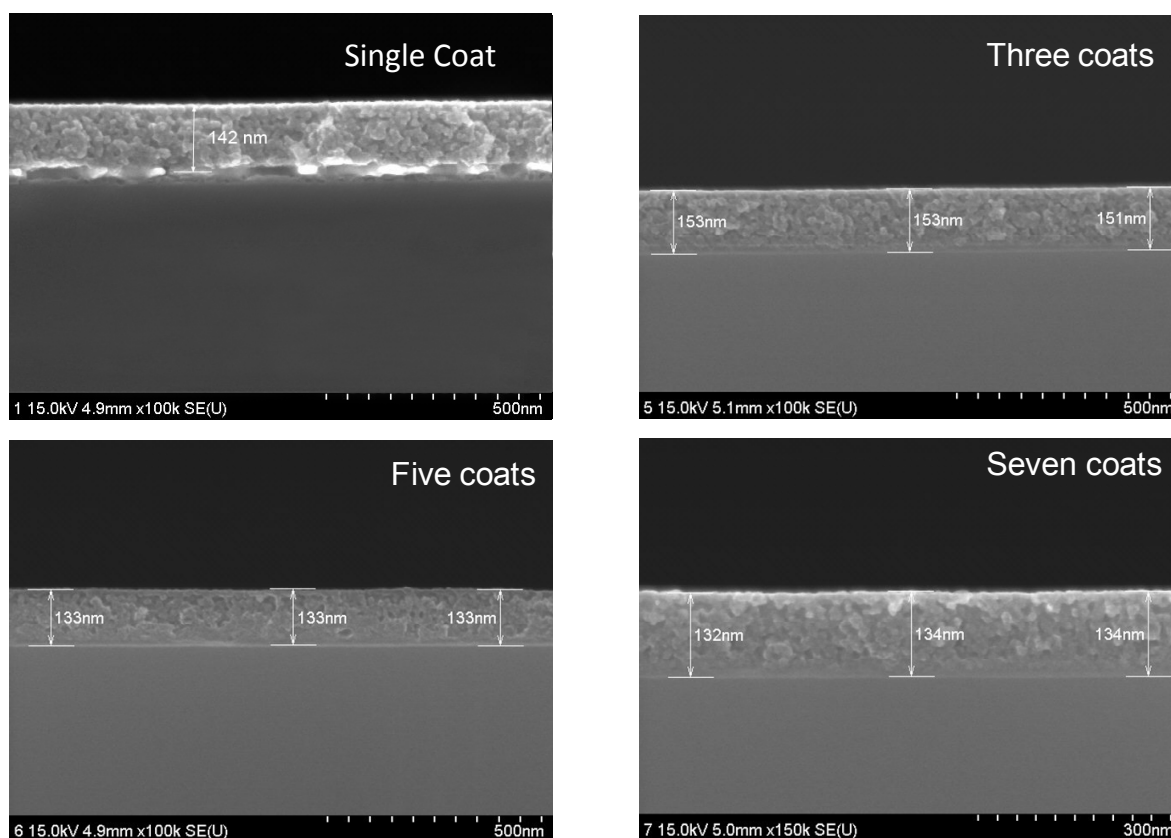

**Figure 1S.** Cross-sectional FESEM images of multiple-coated  $\text{Ba}_x\text{Sr}_{1-x}\text{TiO}_3$  thin films (Case I).

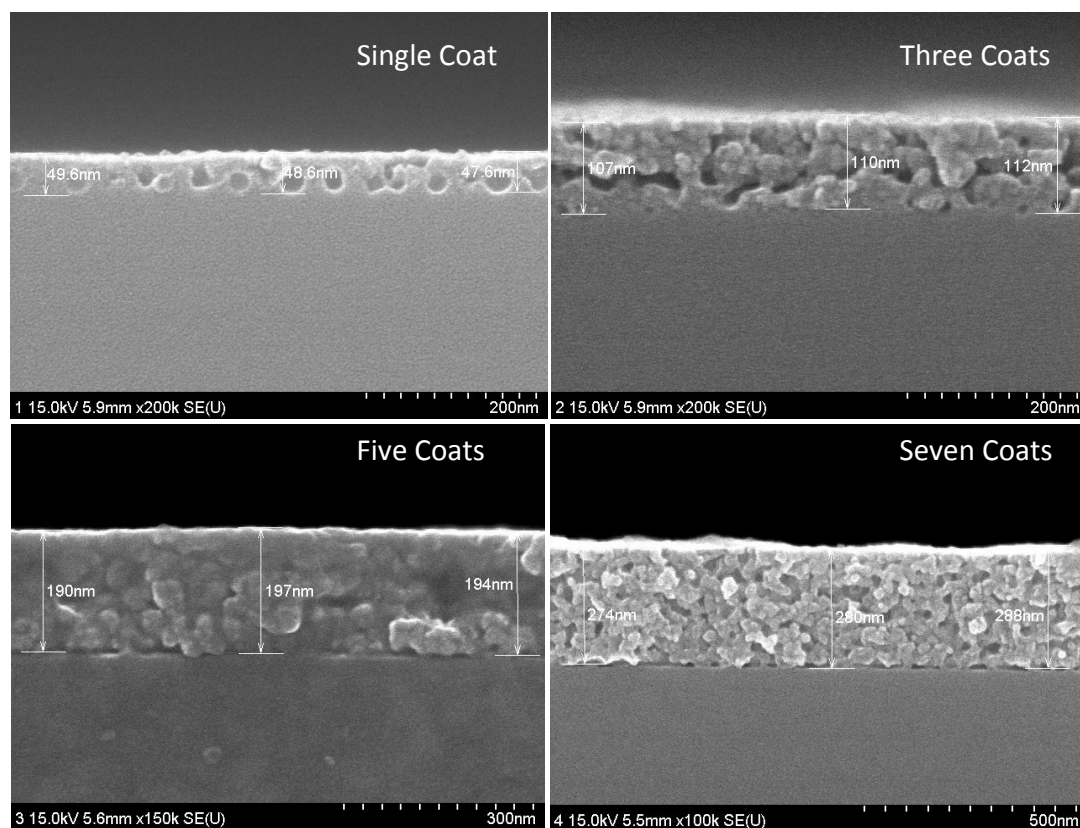

**Figure 2S.** Cross-sectional FESEM images of multiple-coated  $\text{Ba}_x\text{Sr}_{1-x}\text{TiO}_3$  thin films (Case II).

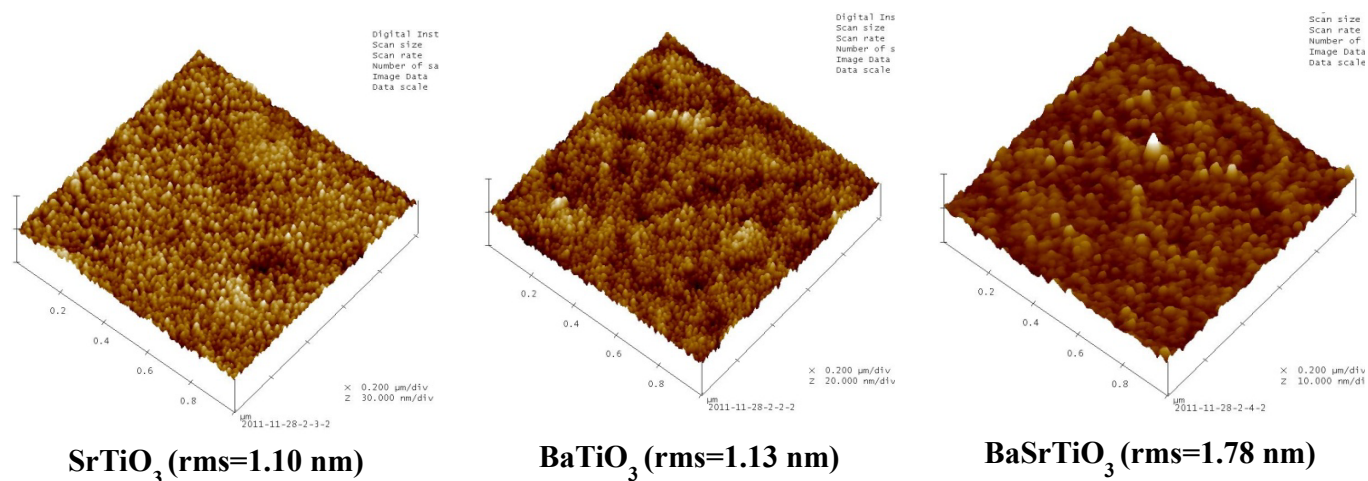

**Figure 3S.** The atomic force microscopy images of the  $\text{Ba}_x\text{Sr}_{1-x}\text{TiO}_3$  thin films annealed at 700 °C.

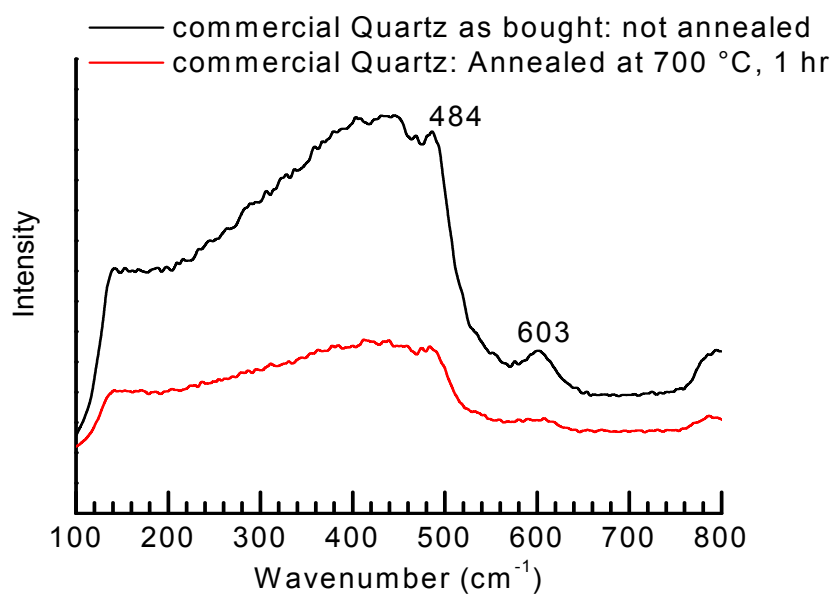

**Figure 4S.** The room temperature Raman spectra of the commercial quartz used in the present study.

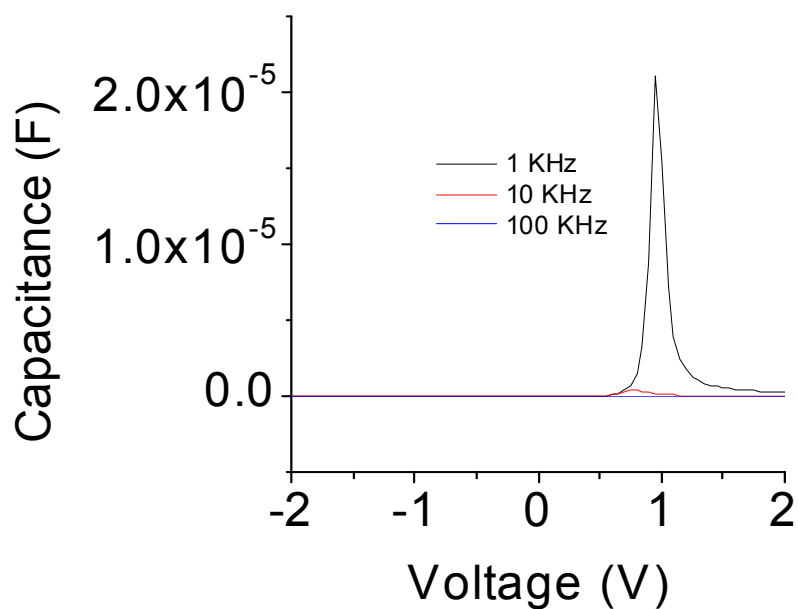

**Figure 5S.** The Capacitance-Voltage plot of Ag/p-Si(110)/Ag at different frequencies.
